# Supplementary material for: Identification and Characterization of MicroRNAs in Channel Catfish (Ictalurus punctatus) by Using Solexa Sequencing Technology
Source: PLoS One. 2013 Jan 16;8(1):e54174. doi: 10.1371/journal.pone.0054174 (PMC3546936; doi:10.1371/journal.pone.0054174)
Supplement: Table S2 — Conserved miRNAs detected in channel catfish. (XLS) [file pone.0054174.s002.xls]

## Sheet: Sheet1
Conserved miRNAs detected in channel catfish
miRNA	mature sequence	star sequence	total read count	mature read count	star read count	position in the mapped reference sequence
ipu-let-7a-1	ugagguaguagguuguauaguu	cuauacaaccuacugucuuucu	167832	167643	186	11:28380078..28380150:-
ipu-let-7a-2	ugagguaguagguuguauaguu	cuguacaaccuccuagcuuucc	166608	166543	65	15:20399528..20399595:+
ipu-let-7a-3	ugagguaguagguuguauaguu	cuauacaacuuacugucuuucc	167161	166513	648	4:17722356..17722428:-
ipu-let-7a-4	ugagguaguagguuguauaguu	cuguacagccuccuagcuuucc	166714	166649	65	5:31628956..31629023:+
ipu-let-7a-5	ugagguaguagguuguauaguu	cuauacagucuauugccuuccu	167101	166509	592	23:5478488..5478566:-
ipu-let-7a-6	ugagguaguagguuguauaguu	cuauacagucuauugccuucc	166718	166582	136	6:54461640..54461716:-
ipu-let-7a-7	ugagguaguagguuguauaguu	cuauacaacuuacugucuuucc	168690	167621	1069	25:2130571..2130643:+
ipu-let-7b-1	ugagguaguagguuguguggu	cuauacaaccuacugccuuccc	17943	15240	2703	4:17721338..17721415:-
ipu-let-7b-2	ugagguaguagguuguguggu	cuauacaaccuacugccuuccc	17943	15240	2703	25:2133285..2133362:+
ipu-let-7c-1	ugagguaguagguuguaugguu	cuguacaaccuucuagcuuucc	17080	16751	329	15:29144939..29145006:+
ipu-let-7c-2	ugagguaguagguuguaugguu	cuguacaaccuucuagcuuucc	17015	16686	329	10:39436606..39436673:-
ipu-let-7d-1	ugagguaguugguuguaugguu	cuguacaaccuucuagcuuucc	2803	2527	276	16:27120429..27120499:+
ipu-let-7d-2	ugagguaguugguuguaugguu	cuguacaaccuucuagcuuucc	2803	2527	276	19:10052403..10052473:+
ipu-let-7e-1	ugagguaguagauugaauaguu	cuauacaaucuacugucuuuc	46703	46624	79	23:5478704..5478777:-
ipu-let-7e-2	ugagguaguagauugaauaguu	cuauacaaucuacugucuuucu	47006	46624	382	6:54462261..54462334:-
ipu-let-7f	ugagguaguagauuguauaguu	cuauacaaucuauugccuucc	22752	22739	13	11:28379876..28379953:-
ipu-let-7g-1	ugagguaguaguuuguauaguu	cuauacagccuacugucuuucu	31915	31486	429	23:18553185..18553256:-
ipu-let-7g-2	ugagguaguaguuuguauaguu	cuauacagucuacugucuuucc	31757	31537	220	23:28779266..28779338:+
ipu-let-7h	ugagguaguaaguuguguuguu	cuauacaauuuacugccuucc	7093	7018	75	23:28779575..28779656:+
ipu-let-7i	ugagguaguaguuugugcuguu	cugcgcaagcuacucccuugc	6331	6313	18	25:1688210..1688287:-
ipu-let-7j-1	ugagguaguuguuuguacaguu	cuguacagacuacugccuugc	15643	15542	101	6:41385658..41385737:+
ipu-let-7j-2	ugagguaguuguuuguacaguu		15542	15542	0	6:41385623..41385680:+
ipu-miR-1	acauacuucuuuauaugcccaua	uggaauguaaagaaguauguau	55	31	24	23:7137177..7137238:+
ipu-miR-100-1	aacccguagauccgaacuugug	caagcuuguaucuauagguauc	113823	113338	485	15:20399298..20399355:+
ipu-miR-100-2	aacccguagauccgaacuugug	caagcucgugucuauagguaugu	113353	113338	15	5:31628647..31628705:+
ipu-miR-101a	uacaguacugugauaacugaag	ucaguuaucacagugcugaugc	85857	84649	1208	6:31057628..31057687:+
ipu-miR-101b	uacaguacuaugauaacugaa	caguuaucaugguaccggugcugu	14512	12233	2279	5:1946504..1946561:-
ipu-miR-103-1	agcagcauuguacagggcuauga	agccucuuuacggugcugccuugu	12062	12039	23	13:15177286..15177346:+
ipu-miR-103-2	agcagcauuguacagggcuauga	ugagccucuuuacaaugcugcc	12258	12252	6	14:47049026..47049088:+
ipu-miR-107a	agcagcauuguacagggcuauc	agcuucuuuacaguguugucuug	9417	9379	38	12:18027658..18027717:+
ipu-miR-107b	agcagcauuguacagggcu		853	853	0	17:23402972..23403026:+
ipu-miR-10a	uacccuguagauccgaauuugu		26613	26613	0	12:28705917..28705976:+
ipu-miR-10b-1	uacccuguagaaccgaauuugu	cagauucgauucuaggggagu	141722	141706	16	9:1943762..1943823:-
ipu-miR-10b-2	uacccuguagaaccgaauuugu		141784	141784	0	23:36181560..36181623:+
ipu-miR-10c	uacccuguagauccggauuugu		66790	66790	0	3:24011907..24011972:+
ipu-miR-10d	uacccuguagaaccgaaugugu		1261	1261	0	6:10777998..10778060:+
ipu-miR-122	uggagugugacaaugguguuu	aacgccauuaucacacua	10042	10019	23	21:9416752..9416807:-
ipu-miR-124a-1	uaaggcacgcggugaaugcc	cguguucacagcggaccuugau	5400	5331	69	20:38930251..38930310:-
ipu-miR-124a-2	uaaggcacgcggugaaugcc	cguguucacagcggaccuugau	5400	5331	69	23:17954169..17954227:+
ipu-miR-124a-3	uaaggcacgcggugaaugcc	cguguucacagcggaccuugau	5400	5331	69	24:25063610..25063667:+
ipu-miR-124a-4	uaaggcacgcggugaaugcc	uguguucacaguggaccuugauu	5379	5331	48	17:27261195..27261253:+
ipu-miR-124a-5	uaaggcacgcggugaaugcc	cguguucacggcggaccuugau	5401	5331	70	8:23975732..23975790:-
ipu-miR-125a-1	ucccugagacccuuaaccugug		4671	4671	0	16:27137465..27137524:+
ipu-miR-125a-2	ucccugagacccuuaaccugug		4689	4689	0	19:10066336..10066395:+
ipu-miR-125b-1	ucccugagacccuaacuuguga		34495	34495	0	15:20409343..20409405:+
ipu-miR-125b-2	ucccugagacccuaacuuguga	acggguuagguucuugggagcu	35439	34495	944	5:31637265..31637327:+
ipu-miR-125b-3	ucccugagacccuaacuuguga	acggguuggguucucgggagcu	34554	34507	47	10:39415844..39415907:-
ipu-miR-125c	ucccugagacccuaacucguga		7269	7269	0	15:29150075..29150136:+
ipu-miR-126a	ucguaccgugaguaauaaugca	cauuauuacuuuugguacgcg	72217	43861	28356	8:12065966..12066026:-
ipu-miR-126b	cauuauuacuuuugguacgcg	ucguaccgugaguaauagugca	28479	28473	6	11:38495974..38496033:+
ipu-miR-128-1	ucacagugaaccggucucuuu		64479	64479	0	22:12504167..12504226:+
ipu-miR-128-2	ucacagugaaccggucucuuu		62470	62470	0	19:44518244..44518303:+
ipu-miR-129-1	cuuuuugcggucugggcuugc		3649	3649	0	4:18115661..18115726:-
ipu-miR-129-2	cuuuuugcggucugggcuugc		3651	3651	0	7:51744932..51744994:-
ipu-miR-129-3	cuuuuugcggucugggcuugc		3651	3651	0	25:31166116..31166180:+
ipu-miR-129-4	cuuuuugcggucugggcuugc		3649	3649	0	18:10118706..10118771:+
ipu-miR-130c-1	gcccuuuuucuguuguacuacu		253	253	0	10:17483625..17483684:+
ipu-miR-130c-2	gcccuuuuucuguuguacuacu		261	261	0	5:14491186..14491245:+
ipu-miR-132a	uaacagucuacagccauggucg	accguggcauuagauuguuacu	5774	5707	67	10:36850228..36850289:+
ipu-miR-132b	accguggcuuuagauuguuacu	uaacagucuacagccauggucg	23269	17656	5613	15:25232534..25232597:+
ipu-miR-133a	uugguccccuucaaccagcugu		130702	130685	0	23:7175227..7175287:+
ipu-miR-133b	uuugguccccuucaaccagcu		4961	4961	0	20:19615549..19615607:-
ipu-miR-133c	uuuggucccuuucaaccagcu		7	7	0	17:5726154..5726212:-
ipu-miR-135a	uauggcuuuuuauuccuauguga		85	85	0	25:32034733..32034794:-
ipu-miR-135b	uauggcuuuuuauuccuaucug	uauagggauggaagccaugca	1714	1398	316	8:26858543..26858604:+
ipu-miR-135c-1	uauggcuuucuauuccuauguga		1295	1295	0	11:39340854..39340916:-
ipu-miR-135c-2	uauggcuuucuauuccuauguga		1295	1295	0	23:18233920..18233982:-
ipu-miR-137	uuauugcuuaagaauacgcguag	acggguauucuuggguggauaau	1386	1377	9	24:32111706..32111765:+
ipu-miR-138-1	agcugguguugugaaucaggccg	gcuauuucacaacaccagggu	12040	12012	28	18:17239337..17239405:+
ipu-miR-138-2	agcugguguugugaaucaggccg	gcuucuucacaacaccagggu	12000	11998	2	16:9055789..9055851:-
ipu-miR-1388	aucucagguucgucagcccauga	aggacuguccaaccugagaau	14530	14449	81	23:13716230..13716290:+
ipu-miR-139	ucuacagugcaugugucuccagu		2455	2455	0	15:47153835..47153895:+
ipu-miR-140	accacaggguagaaccacggac	cagugguuuuacccuaugg	7632	7330	302	25:35855094..35855156:+
ipu-miR-141	uaacacugucugguaacgaug	caucuuaccugacagugcuug	8475	8263	212	6:40586878..40586937:-
ipu-miR-142-1	guaguguuuccuacuuuaugga		17944	17944	0	5:3156826..3156886:+
ipu-miR-142-2	guaguguuuccuacuuuaugga		17944	17944	0	15:14402924..14402984:-
ipu-miR-143	ugagaugaagcacuguagcuc	ggugcagugcugcaucucugguc	77952	77906	46	14:40238787..40238842:+
ipu-miR-144	cuacaguauagaugauguacu	ggauaucaucguauacuguaagu	51968	24905	27063	5:43890674..43890732:-
ipu-miR-145	guccaguuuucccaggaaucccu	auuccuggaaauacuguucuu	4838	4835	3	14:40133399..40133461:+
ipu-miR-146a	ugagaacugaauuccauagaugg	aucuaugggcucaguucuu	33021	32997	24	13:11537689..11537747:+
ipu-miR-146b	ugagaacugaauuccaagggug	cccacggaguucaguucuuaag	10946	10830	116	21:40390767..40390827:-
ipu-miR-148	ucagugcauuacagaacuuugu	aaguucugugauacacuccgacu	12686	11542	1144	9:1634038..1634097:-
ipu-miR-150	ucucccaauccuuguaccagug	cgcuggacgggguuugggggggg	21110	20805	305	3:32708295..32708356:+
ipu-miR-152	ucagugcaugacagaacuuug	aaguucugugauacacuca	676	662	14	3:24387213..24387272:+
ipu-miR-153b	uugcauagucacaaaaaugagc	ucauuuuugugguuugcagcu	741	309	432	6:13891589..13891648:+
ipu-miR-155	uuaaugcuaaucgugauagggguu		1882	1882	0	1:451151..451211:+
ipu-miR-15a-1	uagcagcacagaaugguuugu	caggccguacugugcugcggc	6070	6032	38	1:47219740..47219799:-
ipu-miR-15a-2	uagcagcacagaaugguuugu		5457	5457	0	9:30685838..30685896:-
ipu-miR-15b	uagcagcacaucaugguuugua		16233	16233	0	7:27196780..27196842:+
ipu-miR-16b	uagcagcacguaaauauuggag	ccaguauugaccgugcugcu	125	62	63	1:47219525..47219587:-
ipu-miR-1788	ggcuuguuuuaaguugccugcga		10	10	0	9:11827857..11827914:-
ipu-miR-17a	acugcaguggaggcacuucuag	caaagugcuuacagugcagguagu	24	19	5	1:2806111..2806171:+
ipu-miR-17b	acugcaguggaggcacuucaagc	caaagugcuuacagugcagguagu	15	10	5	9:55420886..55420945:-
ipu-miR-181a-1	aacauucaacgcugucggugag	caucgaccguugauuguacc	356119	347714	8405	22:24551973..24552037:-
ipu-miR-181a-2	aacauucaacgcugucggugag	caucgaccguugacuguacc	347915	347913	2	8:55451669..55451732:-
ipu-miR-181a-3	aacauucaacgcugucggugag		347940	347940	0	2:45255041..45255101:-
ipu-miR-181a-4	aacauucaacgcugucggugag		347681	347681	0	21:7721507..7721567:-
ipu-miR-181a-5	aacauucaacgcugucggugag		347679	347679	0	3:34282756..34282816:+
ipu-miR-181b-1	aacauucauugcugucgguggg		16375	16375	0	2:45252642..45252702:-
ipu-miR-181b-2	aacauucauugcugucgguggg	cucacugaacaaugaaugcaa	16196	16166	30	22:24551766..24551827:-
ipu-miR-181c	cacauucauugcugucggugggu	cucgccggacaaugaaugaga	1529	1440	89	3:34283001..34283058:+
ipu-miR-182	uuuggcaaugguagaacucaca		2770	2770	0	4:14141060..14141125:+
ipu-miR-183	auggcacugguagaauucacug	ugaauuaccaaagggccaua	1087	1081	6	4:14139974..14140033:+
ipu-miR-184	uggacggagaacugauaagggc		271	271	0	18:25989802..25989865:-
ipu-miR-187	ucgugucuuguguugcagccagu	ggcugcaacacaggacaug	1710	1509	201	19:35688380..35688443:+
ipu-miR-18a	uaaggugcaucuagugcaga	acugcccuaagugcuccuucug	445	406	39	1:2806242..2806305:+
ipu-miR-190a	ugauauguuugauauauuagguu		460	460	0	25:34002236..34002294:-
ipu-miR-190b	ugauauguuugauauucgguug		2	2	0	16:19768973..19769036:-
ipu-miR-192	augaccuaugaauugacagcc	ccugucaguucuguaggccacu	73374	73235	139	10:27698862..27698924:+
ipu-miR-194a	uguaacagcaacuccaugugga		1177	1177	0	10:27698681..27698738:+
ipu-miR-196a-1	uagguaguuucauguuguuggga		295	295	0	23:36139655..36139714:+
ipu-miR-196a-2	uagguaguuucauguuguuggga		295	295	0	19:19213374..19213432:+
ipu-miR-196d-1	uagguaguuuuauguuguugggc		152	152	0	16:22997850..22997909:+
ipu-miR-196d-2	uagguaguuuuauguuguugggc		152	152	0	16:22997820..22997873:+
ipu-miR-199a-1	cccaguguucagacuaccuguuc	acaguaguccgcacauugguu	16983	12068	4915	20:14790248..14790308:+
ipu-miR-199a-2	acaguagucugcacauugguu	cccaguguucagacuaccuguuc	51008	38947	12061	5:1695989..1696049:-
ipu-miR-199a-3	acaguagucugcacauugguu	cccaguguucagacuaccuguuc	50970	38909	12061	3:48383379..48383439:-
ipu-miR-199a-4	acaguagucugcacauugguu	cccaguguucagacuaccuguuc	50970	38909	12061	5:66977817..66977877:-
ipu-miR-19a-1	aguuuugcauaguugcacuac		99	99	0	1:2806401..2806459:+
ipu-miR-19a-2	aguuuugcauaguugcacuac		99	99	0	9:55420632..55420690:-
ipu-miR-19b	aguuuugcugguuugcauucagc		40	40	0	1:2806765..2806827:+
ipu-miR-200a	uaacacugucugguaacgaug	caucuuaccggacagugcugga	10387	9777	610	23:24359056..24359115:+
ipu-miR-200b	uaauacugccugguaaugaugau	caucuuacgaggcagcauugga	3019	2971	48	23:24358924..24358984:+
ipu-miR-200c	uaauacugccugguaaugaugc	caucuuacaaggcaguuuugga	2415	2387	28	6:40587080..40587138:-
ipu-miR-202	uuccuaugcauauaccucuuu		85	85	0	13:54068648..54068706:-
ipu-miR-203a	agugguucuuaacaguucaaca	gugaaauguuuaggaccacu	134	85	49	17:45975700..45975758:+
ipu-miR-203b	agugguucucaacaguucaaca		2	2	0	20:27435498..27435557:+
ipu-miR-204-1	uucccuuugucauccuaugccu		9107	9107	0	5:27616634..27616681:+
ipu-miR-204-2	uucccuuugucauccuaugccu		9201	9201	0	7:30673533..30673591:-
ipu-miR-204-3	uucccuuugucauccuaugccu		6702	6702	0	25:35406918..35406976:+
ipu-miR-205-1	uccuucauuccaccggagucugu	gauuucaguggugugaagugua	53537	53534	3	23:33503962..33504022:+
ipu-miR-206-1	uggaauguaaggaagugugugg	acaugcuuccuuauaugcccau	869	861	8	20:19616826..19616886:-
ipu-miR-206-2	uggaauguaaggaagugugugg	acauacuuccuuauauccccaua	753	666	87	17:5730425..5730485:-
ipu-miR-20a	acugcagugugagcacuugaagu	uaaagugcuuauagugcagguagu	1089	1074	15	1:2806615..2806675:+
ipu-miR-210	cugugcgugugacagcggcu	agccacugacuaacgcacauug	15511	9072	6439	25:26371928..26371988:-
ipu-miR-21-1	uagcuuaucagacugguguuggc	gacaacagucuguaggcugucu	295819	294073	1746	10:28880712..28880774:-
ipu-miR-21-2	uagcuuaucagacugguguuggc		283976	283976	0	15:16392837..16392896:+
ipu-miR-212-1	accuuggcucuagacugcuuacu	uaacagucuacagucauggcu	12106	6658	5448	15:25232267..25232334:+
ipu-miR-212-2	accuuggcucuagacugcuuacu	uaacagucuacagucauggcu	11961	6513	5448	10:36849904..36849971:+
ipu-miR-214	acagcaggcacagacaggcaga	ugccugucuacacuugcugugc	4679	4031	648	20:14792434..14792496:+
ipu-miR-216a	uaaucucagcuggcaacuguga		514	514	0	22:31336724..31336787:-
ipu-miR-216b	uaaucucugcaggcaacuguga		4619	4619	0	22:31337028..31337087:-
ipu-miR-217	uacugcaucaggaacugauugg		1032	1032	0	22:31336493..31336552:-
ipu-miR-2187	uuaauuaguauagccuguuuuag	uuacaggcuaugcuaaucuaugc	46	25	21	17:19730927..19730989:-
ipu-miR-2188	aagguccaaccucacaugucc	gcugugugagguuagaccuauc	26274	16483	9791	5:71926695..71926755:-
ipu-miR-218a-1	uugugcuugaucuaaccaug		870	870	0	14:25562472..25562537:-
ipu-miR-218a-2	uugugcuugaucuaaccaug		879	879	0	1:22640985..22641049:+
ipu-miR-218b	uugugcuugaucuaaccaugc		694	694	0	10:17725495..17725553:+
ipu-miR-219a-1	agaauugugccuggacaucugu		1714	1714	0	10:10295371..10295436:-
ipu-miR-219a-2	agaauugugccuggacaucugu		1930	1930	0	5:67610730..67610800:+
ipu-miR-219b	ggaguuguggauggacaucacgc		2	2	0	19:18443591..18443653:-
ipu-miR-221-1	agcuacauugucugcuggguuu	accuggcauacaauguagauuucugu	11100	10374	726	9:34892152..34892214:-
ipu-miR-221-2	agcuacauugucugcuggguuu		10374	10374	0	6:59627909..59627973:-
ipu-miR-221-3	agcuacauugucugcuggguuu		10374	10374	0	9:34892127..34892174:-
ipu-miR-222a	ugcucaguagucaguguagauc	agcuacaucuggcuacugggucuc	22138	14857	7281	9:34892677..34892739:-
ipu-miR-223	gaguauuugacagacugugg	ugucaguuugucaaauacc	111	109	2	5:24017744..24017804:-
ipu-miR-22a	aagcugccagcugaagaacugu	aguucuucacuggcaagcuuu	107779	107269	510	15:24261951..24262014:-
ipu-miR-22b	aagcugccaguugaagagcugu	uucacuggcuagcuuuau	34168	34146	22	5:13813166..13813220:+
ipu-miR-23a-1	aucacauugccagggauuucc	ggauuccuggcagagugauuu	4137	4129	8	22:4997605..4997668:+
ipu-miR-23a-2	aucacauugccagggauuucc		4533	4533	0	3:13208751..13208811:+
ipu-miR-23a-3	aucacauugccagggauuucc	ggaauuccuggcagagugauuu	4173	4165	8	2:33618320..33618378:+
ipu-miR-23b-1	aucacauugccagggauuacc		3126	3126	0	10:15983163..15983224:+
ipu-miR-23b-2	aucacauugccagggauuacc	ggguuccuggcgugcugauuu	3128	3126	2	8:31015679..31015737:-
ipu-miR-24-1	uggcucaguucagcaggaacagg	ugccugcugugcugauaaucagu	1195	1134	61	10:15989420..15989480:+
ipu-miR-24-2	uggcucaguucagcaggaacagg		1136	1136	0	3:13298303..13298362:-
ipu-miR-24-3	uggcucaguucagcaggaacagg	ugccugcugugcugauaaucagu	1195	1134	61	8:31010573..31010631:-
ipu-miR-25	cauugcacuugucucggucuga		46555	46555	0	14:205371..205431:-
ipu-miR-26a-1	uucaaguaauccaggauaggcu		316494	316494	0	9:42806586..42806646:+
ipu-miR-26a-2	uucaaguaauccaggauaggcu	ccuauucaugauuacuugcacu	279800	279715	85	2:21171603..21171661:+
ipu-miR-26a-3	uucaaguaauccaggauaggcu		317854	317854	0	24:21079443..21079504:-
ipu-miR-26b	uucaaguaauccaggauagguu		136430	136430	0	23:24962562..24962623:-
ipu-miR-27a	uucacaguggcuaaguuccgcu		9329	9329	0	2:33620235..33620300:+
ipu-miR-27b	uucacaguggcuaaguucugc	agagcuuagcugauuggugaac	74386	73673	713	8:31015490..31015550:-
ipu-miR-27c	uucacagugguuaaguucug		62326	62326	0	3:13304515..13304575:-
ipu-miR-27d	uucacaguggcuaaguucuucac		2746	2746	0	10:15983313..15983380:+
ipu-miR-27e	uucacaguggcuaaguucagu		4328	4328	0	22:5004351..5004415:+
ipu-miR-29b	gcugaauucagauggugccauaga		1213	1213	0	6:47408928..47408989:+
ipu-miR-29c	cugguuucacauggugguuuaga		46	46	0	4:10672732..10672793:-
ipu-miR-301a	cagugcaauaguauugucaaagc	ucugacuucauugcacuacu	329	170	159	10:34405188..34405246:-
ipu-miR-301c	cagugcaauaguauugucauagc	gcucugacgauguugcacuacu	1514	1502	12	10:17484721..17484782:+
ipu-miR-30a	cuuucagucugauguuugc		35	35	0	19:4497693..4497752:+
ipu-miR-30b	uguaaacauccuacacucagcu		59	59	0	16:27581020..27581081:+
ipu-miR-30c	uguaaacauccuacacucucagcu	ccgggagugggauguuugcgcu	113	99	14	13:28027967..28028028:+
ipu-miR-30d	cuuucaguuggauguuugcugu	uguaaacauccccgacugga	1165	983	182	16:27580731..27580796:+
ipu-miR-30e	cuuucagucggauguuugcagc	uguaaacauccuugacuggaagcu	15583	15315	268	13:28019030..28019092:+
ipu-miR-31	uggcaagauguuggcauagcug	ugcuaugccuccauauugccauu	147	113	34	7:76268843..76268904:+
ipu-miR-338-1	uccagcaucagugauuuuguug	aacaaucuccugaugcugccuga	40330	40113	217	12:38062331..38062391:+
ipu-miR-338-2	uccagcaucagugauuuuguug	aacaauauccugaugcuga	40115	40113	2	12:18795108..18795169:+
ipu-miR-338-3	uccagcaucagugauuuuguug	aacaauauccuggugcugccuga	40335	40113	222	3:52527418..52527478:-
ipu-miR-34a	uggcagugucuuagcugguugu		334	330	0	23:22885218..22885283:+
ipu-miR-34b	aggcaguguuguuagcugauugu	aucacuaaccauacugccaaca	140	94	46	5:59271642..59271702:-
ipu-miR-34c	aaucacuaaccucacuaccagg		91	91	0	5:59271406..59271463:-
ipu-miR-363	aauugcacgguauccaucuguaa		132	132	0	14:32336576..32336649:-
ipu-miR-365-1	agggacuuuuaggggcagcu		3	3	0	6:19394001..19394062:+
ipu-miR-365-2	agggacuuuuaggggcagcu		3	3	0	3:44211669..44211730:+
ipu-miR-375-1	uuuguucguucggcucgcguu	acguugagccacacgcacaauac	5301	5285	16	6:13710704..13710761:-
ipu-miR-375-2	uuuguucguucggcucgcguu		5199	5199	0	9:11848215..11848274:-
ipu-miR-429a	uaauacugucugguaaugccg	gucuuaccagacaugguuaga	9677	9673	4	23:24360711..24360769:+
ipu-miR-429b	uaauacugccugguaaugcca		378	378	0	6:40584015..40584071:-
ipu-miR-454b	uagugcaauauugcuuauagggu		1378	1378	0	5:14498678..14498741:+
ipu-miR-455a	uaugugcccuuggacuacaucg	gcaguccaugggcauauacacu	5500	5142	358	5:67759761..67759821:-
ipu-miR-455b	uaugugcccuuggacuacauug	gcaguccaugggcauauacacu	1892	1534	358	16:55426121..55426181:+
ipu-miR-456	caggcugguuagaugguuguca		2566	2566	0	17:22657091..22657153:+
ipu-miR-457a	aagcagcacaucaauauuggca	ugccaguaugguuugugcug	3990	3986	4	7:27197304..27197364:+
ipu-miR-458	auagcucuuugaaugguacugc	agcgccauuuacagagcuaua	8501	8492	9	14:26237193..26237251:-
ipu-miR-459	ucaguaacaaggauucauccug		26	26	0	1:1275358..1275421:+
ipu-miR-460	cacagcgcauacaauguggaugc	ccugcauuguacacacugugc	100	80	20	2:2103472..2103532:-
ipu-miR-462	uaacggaacccauaaugcagcug		479533	479533	0	8:26935261..26935325:+
ipu-miR-489	ugacaucauauguacggcugcu	uggucguauguaugacgucauu	928	912	16	19:41741814..41741875:-
ipu-miR-499-1	uuaagacuugcagugauguuu	aacaucacuuuaagucugugcu	880	844	36	11:26138727..26138786:-
ipu-miR-499-2	uuaagacuugcagugauguuu	aacaucacuuuaagucugugcu	880	844	36	23:18902053..18902113:+
ipu-miR-724-1	uuaaagggaauuugcgacuguu	cagccacaccuuccuuuuaaga	68	48	20	11:3157051..3157111:+
ipu-miR-724-2	uuaaagggaauuugcgacuguu	cagccacaccuuccuuuuaaga	68	48	20	8:24917166..24917227:+
ipu-miR-728-1	auacuaaguacacuacguuuuc		26	26	0	24:26987166..26987227:+
ipu-miR-728-2	auacuaaguacacuacguuuuc		26	26	0	2:3258308..3258370:-
ipu-miR-730-1	uccucauugugcaugcugugug	cacagcgccugcaauguggaggc	394	365	29	7:24529266..24529327:+
ipu-miR-730-2	uccucauugugcaugcugugug		365	365	0	7:24529238..24529288:+
ipu-miR-737	guuuuuuuagguuuugauuuuu		1017	1017	0	18:44379304..44379365:+
ipu-miR-7a-1	uggaagacuagugauuuuguugu	caacaagucauagucugccuca	756	748	8	25:13574428..13574492:-
ipu-miR-7a-2	uggaagacuagugauuuuguugu		736	736	0	7:15327912..15327977:-
ipu-miR-7a-3	uggaagacuagugauuuuguugu	caacaagucacagucugccuca	756	736	20	8:451299..451363:+
ipu-miR-7a-4	uggaagacuagugauuuuguugu		660	660	0	16:48966523..48966588:+
ipu-miR-7a-5	uggaagacuagugauuuuguugu	caacaagucacagucuaccuca	744	736	8	25:13574469..13574543:-
ipu-miR-7b	uggaagacuugugauuuuguugu		238	238	0	5:56985018..56985082:-
ipu-miR-9-1	ucuuugguuaucuagcuguauga		115271	115271	0	16:31444476..31444538:+
ipu-miR-9-2	ucuuugguuaucuagcuguauga		115271	115271	0	10:45056166..45056226:-
ipu-miR-92a-1	uauugcacuugucccggccugu		132759	132759	0	1:2806885..2806944:+
ipu-miR-92a-2	uauugcacuugucccggccugu		83273	83273	0	9:55420230..55420287:-
ipu-miR-92b	uauugcacucgucccggccucc		35400	35400	0	16:45736495..45736558:+
ipu-miR-9-3	ucuuugguuaucuagcuguauga		115297	115297	0	25:8759290..8759349:-
ipu-miR-9-4	ucuuugguuaucuagcuguauga	uaaagcuagagaaccgaaugua	115639	115295	344	22:18478870..18478930:+
ipu-miR-9-5	ucuuugguuaucuagcuguauga		115271	115271	0	5:49952900..49952960:-
ipu-miR-96	uuuggcacuagcacauuuuugcu	caauuauguguagugccaauau	42	32	10	4:14140130..14140194:+
ipu-miR-9-6	ucuuugguuaucuagcuguauga		115271	115271	0	7:15256924..15256986:-
ipu-miR-9-7	ucuuugguuaucuagcuguauga		115297	115297	0	2:59942589..59942647:-
ipu-miR-99a	aacccguagauccgaucuugug	caagcucgauucugugggucu	7917	7316	601	10:39438841..39438899:-
ipu-miR-99b	aacccguagauccgaucuuguga		20580	20580	0	15:29144690..29144749:+
